# Supplementary material for: Human Neural Organoid Microphysiological Systems Show the Building Blocks Necessary for Basic Learning and Memory
Source: PubMed Central journal article supplement — bioRxiv. 2024 Sep 19:2024.09.17.613333. Preprint. [Version 1] doi: 10.1101/2024.09.17.613333 (PMC11429697; doi:10.1101/2024.09.17.613333), 2024-09-19

704 Supplemental Figure 1. A) Expression of NPC and proliferation markers, B) astrocyte marker, C) glial  
705 markers D) neuronal dendrite marker at weeks (W) 2, 4, 8, 10 and 12 of organoid differentiation. A-D)  
706 Data is represented as  $\log_2$  of the difference in expression, normalised to NPCs. *ACTB* was used as a  
707 reference gene. Data represents 2-3 independent experiments with 3 technical replicates each. E)  
708 Estimated brain region proportions of W8 organoids using multiple deconvolution methods (ordinary  
709 least squares, non-negative least squares regression, quadratic programming without constraints,  
710 quadratic programming non-negative and sum-to-one constraints, dtangle, robust linear regression,  
711 support vector regression) on bulk RNAseq data (4 biological replicates – T14-T17).

# Figure S1

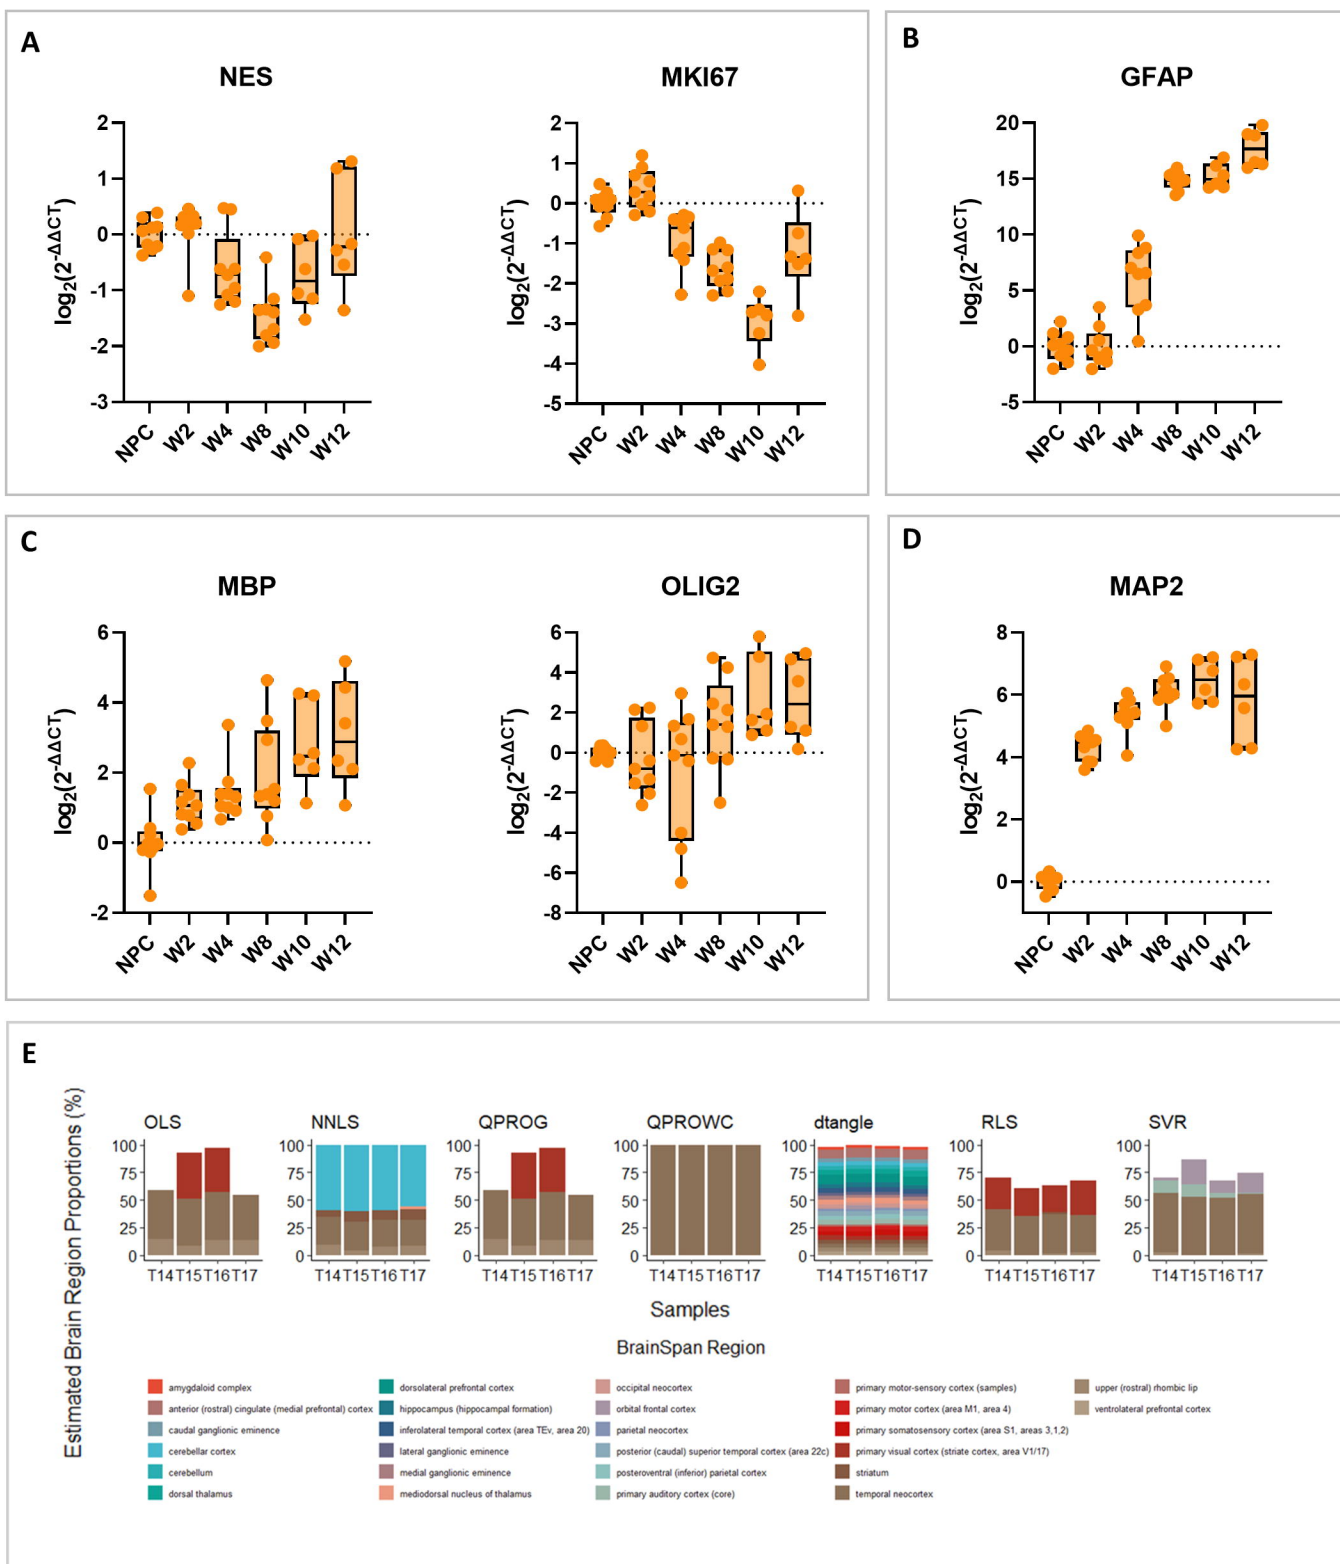

Supplement: NIHPP2024.09.17.613333v1-supplement-1.pdf [file NIHPP2024.09.17.613333v1-supplement-1.pdf]
